# Supplementary material for: Musashi-1 promotes stress-induced tumor progression through recruitment of AGO2
Source: Theranostics. 2020 Jan 1;10(1):201–17. doi: 10.7150/thno.35895 (PMC6929620; doi:10.7150/thno.35895)

## SUPPLEMENTARY INFORMATION

### FIGURE SLEGENDS

#### **Figure S1. MSI1 is important for tumor malignance and tumor progression.**

**(A-B)** Non-tumorous and different grade of brain tumor tissues from clinical patients were analyzed by IHC to assess the MSI1 expression levels. The ratio of MSI1 expression in each group was presented in the graph. Data are presented as the mean  $\pm$  SD of triplicated experiments.  $*p < 0.001$  (Student's t-test). **(C and G)** 05MG cells stably transfected with the Flag-control, Flag-tagged MSI1 or scramble-control and MSI1-knockdown cells. The immunoblots to confirm the protein expression of Flag-tagged MSI1 or endogenous MSI1 with anti-flag antibody or anti-MSI1 antibody. **(D and H)** 05MG/Flag-control and 05MG/Flag-tagged MSI1 or scramble-control and MSI1-knockdown cells were subjected to colony formation assay for 10 days, and the numbers of colony were quantitated by Image J software. **(E and I)** 05MG/Flag-control and 05MG/Flag-MSI1 or scramble-control and MSI1-knockdown cells were subjected an apoptosis assay determined by annexin V staining. **(F and J)** Null mice were subcutaneously transplanted with 05MG/Flag-control and 05MG/Flag-tagged MSI1 or scramble-control and MSI1-knockdown cells. Tumor size was measure with a caliper at the indicated time points. N = 6.  $**P < 0.05$  vs. 05MG/Flag-control cells or 05MG/Scramble cells.

#### **Figure S2. MSI1 translocated into cytosol under hypoxia or cisplatin treatment in different cell lines.**

**(A-D)** Left: Immunoblots of the protein expression of MSI1, Laminin A/C and GAPDH in nuclear and cytosolic compartments of two patient-derived primary GBM cells (Pt 3 and Pt 11) as well as MIA-PaCa2 PDAC cells treated with 24-hour hypoxia (T: total protein, C:

cytoplasmic, N: nuclear). Right: Pt 3, Pt 11, and MIA-PaCa2 under normoxia or hypoxia for 24 hours were subjected to anti-MSI1 (green) immunofluorescent staining and DAPI (blue) nuclear counter stain. Images were acquired from Carl Zeiss confocal microscope system. Both cells showed increased cytosolic MSI1 under hypoxia condition. **(E)** The translocation of MSI1 in 05MG cells is induced by cisplatin. Top: 05MG cells pre-treated with or without nuclear export inhibitor leptomycin B (LMB) (10 ng/mL, 2 hours) were further treated by cisplatin (30  $\mu$ M) for 24 hours. The localization of MSI1 and the nucleus were stained by anti-MSI1 (green) and DAPI (blue), respectively. **(F)** Functional validation of the identified nuclear exporting signal (NES) using GFP-tagged expressing vectors. Cells transfected with the GFP, NES fused GFP (NES-wt-GFP), or GFP fused with mutated NES (NES-mut-GFP) were treated with or without LMB (10 ng/ml for 2 hours). Top: The scheme for the construction of wildtype NES and mutated NES fused with GFP protein; Bottom: the confocal microscopy imaging for the GFP distribution. **(G-I)** 05MG cells transfected with wildtype or mutated MSI1 were subjected to functional analyses to assess cell proliferation, apoptosis, and clonogenic growth. Hypoxia-induced apoptosis was withdrawn by the over-expression of wild-type MSI1 but not in mutant MSI1 groups determined by annexin V staining, MTT assay, and colony forming assay.

**Figure S3. The trafficking MSI1 is essential in MSI1-mediated oncogenic events.**

05MG cells stably transfected with the Flag-control, Flag-tagged MSI1-wt, Flag-tagged-MSI1-NES-mut and Flag-tagged MSI1-NLS-mut cells. **(A)** The immunoblots to confirm the protein expression with anti-flag antibody. **(B)** The real-time PCR to confirm the MSI1 mRNA expression level. **(C)** Total lysate, nuclear, and cytoplasmic fractionations of 05MG cells with different stable clone cells under normoxia (N) or hypoxia for 24 hr (H) were subjected to immunoblotting with Flag, Lamin A/C (nuclear internal control) and GAPDH (cytosolic control) antibodies. **(D)** The different stable clone cells were subjected to an MTT viability assay. **(E)**

The different stable clone cells were subjected an apoptosis assay determined by annexin V staining. **(F)** The different stable clone cells were subjected to colony formation assay for 10 days, and the numbers of colony were quantitated by ImageJ software.

**Figure S4. MSI1 interacted with AGO2 in the cytosol under hypoxia and cisplatin treatment.**

**(A)** Coomassie blue stained SDS-PAGE of the normoxia and hypoxia samples for LC-MS/MS. **(B)** The list of MSI1-bound and stress-related proteins identified by LC-MS/MS analysis in 05MG cells. **(C)** Immunoblotting confirmed the candidates identified by proteomic analysis with or without RNase A treatment for 1 hr before immunoprecipitation **(D)** Co-immunoprecipitation of endogenous AGO2 with MSI1 in MIA-PaCa2 PDAC cell line treated with or without hypoxia for 24 hours. **(E)** Endogenous AGO2 was immunoprecipitated in 05MG cell lysates with anti-MSI1 antibody under cisplatin (30  $\mu$ M) stimulation for 24 hrs. MSI1 was pulled down by MSI1 antibody and then subjected to immunoblotting using anti-MSI1 and anti-AGO2 antibody. **(F)** 05MG cells expressing FRET pairs of MSI1-orange and AGO2-GFP were bleached (bottom) at the region of interest (ROI) indicated by the rectangular. Unbleached controls were also performed (top). Fluorescent emission intensities of MSI1 (red) and AGO2 (green) during acceptor photobleaching experiments were shown in the left panel and quantified in the right panel. Quantification of FRET photobleaching experiments was performed by calculating FRET efficiencies for the FRET pairs MSI1 (red)-AGO2 (green). Data represent the mean  $\pm$  S.D. of three independent experiments performed in triplicate. \*  $P < 0.05$  and \*\* $P < 0.01$  vs control. **(G-H)** 05MG cells were under hypoxia or cisplatin (30  $\mu$ M) for 24 hrs with or without LMB (10 ng/mL). Co-localization of MSI1 (green) and AGO2 (red) was observed by confocal microscopy. Images were acquired from Carl Zeiss confocal microscope system.

**Figure S5. Both MSI1 and AGO2 are essential in MSI1-mediated oncogenic events.**

**(A-C)** The 05MG/Flag-control, 05MG/MSI1-wt, 05MG/MSI1-NES-mut and 05MG/MSI1-NLS-mut cells were subjected to immunoblotting with AGO1, AGO2 and Flag antibodies and real-time PCE to ensure the AGO1 and AGO2 mRNA expression level. **(D)** Western blot analysis confirmed the knockdown efficiency of AGO2 (clone #1 and #2) in MSI1-overexpressed cells. **(E)** 05MG/Flag-control, 05MG/MSI1-wt and 05MG/MSI1-wt/shAGO2 cells were subjected to an apoptosis assay determined by annexin V staining. Hypoxia-induced apoptosis was withdrawn by the over-expression of MSI1 but not with additional knockdown of AGO2. **(F)** Immunocompromised mice were subcutaneously transplanted with 05MG/MSI1-wt and 05MG/MSI1-wt/shAGO2 cells. Tumor size was then monitored for 22 days. N = 6. \*P < 0.05 vs. 05MG/MSI1-wt cells.

**Figure S6. Identification of mRNA binding targets of MSI1/AGO2.**

**(A)** Total RNAs isolated from immunoprecipitation (IP) in cell under normoxia or hypoxia were subjected to mRNA quantitation by using qPCR with specific primer.

**Figure S7. The C-terminal of MSI1 suppress downstream protein expression.**

**(A)** Flag-control and Flag-C-term transfected cells under normoxia, hypoxia for 24 hrs or recovery to normoxia for 6 hrs condition were subjected to immunoblotting with antibody of TP53, NF2, CDKN1A, CCND1, CDK4, HELLS and actin.

## **SUPPLEMENTARY METHODS**

### **Cell culture and clinical tissue**

The human GBM cell line 05MG (Denver Brain Tumor Research Group 05), human pancreatic ductal adenocarcinoma cell line (MIA-PaCa2), and its derivative stable cell lines, MSI1-WT, MSI1-NES-mut and MSI1-NLS-mut stable cell lines were cultured in Dulbecco's Modified Eagle's Media (DMEM, Life Technologies Inc., Carlsbad, CA, USA) supplemented with 10 % fetal bovine serum (HyClone Laboratories Inc., South Logan, UT, USA), 150g/mL G418 (SIGMA, Cat#A1720), 100 units/mL penicillin, and 100 µg/mL streptomycin (Life Technologies Inc., Carlsbad, CA, USA) under standard culture condition (37°C, 95 % humidified air and 5 % CO<sub>2</sub>). Sub-cultures were performed with 0.25% trypsin-EDTA (Sigma-Aldrich Co. LLC., St. Louis, MI, USA). All cells lines were tested for microplasma contamination. The clinical tissue samples and tumor cell cultures were acquired from the Neurological Institute of Veterans General Hospitals and Department of Neurological Surgery of Tri-Service General Hospital. All procedures of tissues acquirements have followed the tenets of the Declaration of Helsinki and are reviewed by Institutional Review Committee at Taipei Veterans General Hospital and Tri-Service General Hospital.

### **Animal care, tumor cell transplantation, and non-invasive imaging**

All procedures involving animals were performed in accordance with the institutional animal welfare guidelines of Taipei Veterans General Hospital. For subcutaneous transplantation, cells were harvested, washed, suspended in PBS. A total volume of 100 µl with  $1 \times 10^6$  cells were injected subcutaneously into the dorsolateral side of the flank region of 8-week-old male BALB/C nude mice (National Laboratory Animal Center, Taipei, Taiwan) bred and maintained following to the Guidelines for Laboratory Animals in the Taipei Veterans General Hospital. Fourteen days after subcutaneous injection, 2 mg/kg of cisplatin was injected mice

twice a week for two weeks through tail vein injection to mimic clinical chemotherapy. Tumor size was measured with calipers [1]. Six mice were used for each condition in each experiment.

For orthotopic transplantation, cells were harvested, washed with PBS, and spun down to remove excess PBS. A total volume of 2.5  $\mu$ l with  $5 \times 10^5$  were injected orthotopically into the brain of 8-week-old male SCID mice (National Laboratory Animal Center, Taipei, Taiwan) bred and maintained according to the Guidelines for Laboratory Animals in the Taipei Veterans General Hospital. After 14 days of subcutaneous injection, 2 mg/kg of cisplatin was injected into mice twice a week for two weeks through tail vein to mimic clinical chemotherapy.

### **Plasmid constructions and transfection**

MSI1 gene was amplified and sub-cloned from human genomic DNA. The p3XFlag-MSI1 and pmOrange-MSI1 plasmids were generated by inserting a 1038-bp fragment of full-length human MSI1 cDNA into the HindIII/BamHI site of p3XFlag-myc-CMV-26 vector (Sigma, No. E 6401) and pmOrange vector (Clontech, No. 632592). PCR-amplified DNA fragments with proper restriction cutting sites were introduced by PCR. The primers used for amplification were listed in Table S 5. MSI1-NES-mutant and MSI1-NLS-mutant [2] clones were created by site-directed mutagenesis according to the manufacturer's instruction (QuikChange II site-directed mutagenesis kit, #200523/200524). The used primers were listed as Table S5

MSI1 C-terminal deletion clone was created by PCR amplification using p3XFlag-MSI1 as the template. The DNA fragments were introduced by an additional restriction enzyme cutting sites by PCR. The 3xFlag-MSI1-C-term plasmid or pEGFP-MSI1-C-term were generated by inserting a 539-bp fragment into the p3XFlag-myc-CMV-26 vector or pEGFP-C1-Vector (Clontech, No.632592). The used primers were listed in Table S.5. MSI1 C-

terminal truncation clones were created by PCR amplification using p3XFlag-MSI1 plasmid as the template. The 3xFlag-MSI1-deletion plasmids were generated by inserting 870, 804, 770 and 732-bp fragment into the HindIII/BamHI sites of the p3XFlag-myc-CMV-26 vector. The used primers were listed in Table S5.

In vitro plasmid transfection was carried out using jetPEI DNA transfection reagent (Polyplus Transfection, Huntingdon, UK) according to the manufacturer's instruction. In vivo plasmid transfection in mice were performed with *in vivo*-jetPEI in vivo nucleic acid delivery reagent (Polyplus-transfection, Illkirch, France). For each intratumoral transfection, 10 µg of FLAG-C-term expression plasmid were mixed with 2 µl of *in vivo*-jetPEI in a total volume of 50 µl.

### **Gene expression analysis.**

The RNA samples from 05MG cells were isolated using TRIzol and confirmed by NanoDrop ND-1000. The RNA integrity was assessed by agarose gel electrophoresis. The gene Expression array (Agilent Technologies) is a customized design with 336 genes identified from the NGS data. The quantitative results were initially aligned by bowtie-1.1.2 and the *express*-1.5.1 was used for the calculation of quantitative performance following the previous reports [3, 4]. The highest measure of transcripts in average are considered the gene expression, and subsequently standardized by (expression – mean value) / standard deviation.

### **Gene silencing using small interference RNA (siRNA)**

Targeted gene silencing for MSI1, AGO2, and scrambled control were purchased from GE Dharmacon On-TARGETplus siRNA smart pools. Transient transfection was carried out using INTERFERin siRNA transfection reagent (Polyplus Transfection, Huntingdon, UK) according to the manufacturer's instruction (siRNA for MSI1: SASI\_Hs01\_00145278, siRNA for AGO2: SASI\_Hs01\_00161740, siRNA for NC cont: SG00217942, Sigma Aldrich Co., St.

Louis, MO, USA). Cell-based experiments were performed after 2-day incubation.

### **Cell viability assay**

MSI1-WT, MSI1-NES-mut, MSI1-NLS-mut and MSI1-C-term in MSI1-overexpressed cells were seeded in 24-well plates (3000 cells per well) with complete growth medium. The medium was replaced by either solvent or chemicals with indicated concentrations in complete medium. Cell viability assay was then performed. In brief, cells were stained with 0.1 mg/ml 3- (4,5-cimethylthiazol-2-yl)-2,5-diphenyl tetrazolium bromide (MTT, SIGMA, Cat#M2003) for 2 hours and the formazon crytals were then dissolved in DMSO. The relative absorbance was then measured by TECAN Sunrise ELISA plate reader (Thermo Scientific Inc., Waltham, MA, USA) at 570 nm light absorbance.

### **Colony formation assay**

MSI1-WT, MSI1-NES-mut and MSI1-NLS-mut were seeded in 6-well plates (1,000 cells per well) and were incubated for 24 hours. The cells were then subjected to hypoxic condition for additional 24 hours. Further 10-day incubation was performed, and the cells were fixed by 10 % formalin, and stained by 4 % trypan blue (w/v) for 20 min. The stained colonies were washed by PBS and counted.

### **Determination of apoptosis**

Apoptotic events were determined by Annexin V (BD Pharmingen™, #556547). For flow cytometry, cells were harvested and stained with both Annexin V and PI for 10 min. The cells were washed by PBS and resuspended in HEPES for subsequent flow cytometry analysis.

### **Preparation of nuclear and cytosolic extracts**

Nuclear and cytosolic extracts were isolated with a Nuclear and Cytoplasmic Extraction kit

(Pierce Chemical, Rockford, IL). After the incubation period, cells were collected by centrifugation at 1000rpm for 5 mins at 4°C. The pellets were washed twice with ice-cold PBS, followed by the addition of 0.2 ml of cytoplasmic extraction buffer A and vigorous mixing for 15 sec. Ice-cold cytoplasmic extraction buffer B (11µl) was added to the solution. After vortex mixing, nuclei and cytosolic fractions were separated by centrifugation at 13000 rpm for 5 mins. The cytoplasmic extracts (supernatants) were stored at -80°C. Nuclear extraction buffer was added to the nuclear fractions (pellets), which were then mixed by vortex mixing on the highest setting for 15 sec. The mixture was chilled, and a 15 sec vortex was performed every 10 mins for a total of 40 mins. Nuclear fraction was centrifuged at 13,000 rpm for 10 mins. The nuclear extracts (supernatants) were stored at -80°C until use.

### **Western blotting**

Protein samples were prepared with RIPA buffer (Thermo Scientific Inc., Waltham, MA, USA) containing 1% protease inhibitor. Equal weight of total protein was separated by electrophoresis on SDS/PAGE. After the proteins had been transferred onto a polyvinylidene difluoride membrane (Millipore, Bedford, MA, USA), the blots were incubated with blocking buffer (1 X PBST and 5% skim milk) for 1 hour at room temperature and then hybridized with primary antibodies overnight at 4°C, followed by incubation with horseradish peroxidase-conjugated secondary antibody for 1 hour at room temperature. The blots were obtained by X-ray film exposure, and the intensities were quantified by densitometry analysis (Digital Protein DNA Imagineware, Huntington Station, NY). All antibodies were followed: Table S 8.

### **RNA extraction**

Cells were lysed by TRIzol reagent (Life Technologies Inc., Carlsbad, CA, USA) followed by phenol: chloroform purification and ethanol precipitation. Single strand cDNA was reversely

transcribed by SuperScript III reverse transcriptase (Life Technologies Inc., Carlsbad, CA, USA). Oligonucleotides used for PCR analysis (Table S 6) were designed using Primer Express 2.0 (Applied Biosystems, Foster City, CA, USA).

### **Quantitative real-time PCR (qRT-PCR)**

Oligonucleotide specificity was computer tested (BLAST, National Center for Biotechnology Information, Bethesda, MD, USA) by homology search with the human genome and later confirmed by melting curve analysis. The qRT-PCR was performed with power SYBR Green PCR Master Mix (Applied Biosystems, Foster City, CA, USA) according to manufacturer's instruction. Signals were detected using 7900HT Fast Real-time PCR system (Applied Biosystems, Foster City, CA, USA). The expression level of each gene was normalized to endogenous 18S and experimental control through  $\Delta C_t$  methods. All the antibodies and PCR primers used were listed (Table S 6). The heatmap of qPCR array data was visualized in R statistical language with ggplot2 package.

### **Co-immunoprecipitation (Co-IP)**

The cells were washed three times with ice-cold PBS and collected by trypsinizing. After centrifugation, cell pellets were resuspended in Buffer-G (50mM Tris pH 7.5 , 170mM NaCl, 13mM MgCl<sub>2</sub>, 0.5% NP40, 0.3% Triton X-100, protease inhibitor cocktail) containing 100000 U of RNasin Plus RNase inhibitor (Promega Inc., Waltham, MA, USA, N2615). Firstly, the Dynabeads Protein-G (Invitrogen Inc., Carlsbad, CA, USA, 10003D) was incubated with 2.5 $\mu$ l antibody 30 minutes at room temperature. Next, 1 mg protein lysate was incubated with protein-G conjugated-antibody beads for 6 hours or overnight at 4°C. Dynabeads Protein-G was separated by magnetic beads separation stand (Invitrogen Inc., Carlsbad, CA, USA) and wash 3 times in buffer G. Protein was analyzed by SDS-PAGE. All the used antibodies were listed in Table S 8.

## **Recombinant proteins and pull-down assay**

The cDNA of human AGO2 and MSI1 were obtained from Addgene, PCR-amplified, and subcloned into pFASTBAC vector in-frame to an N-terminal 6xHis or FLAG tag, respectively. The baculoviruses for His-AGO2 and FLAG-MSI1 were prepared according to the manual of Bac-To-Bac Baculovirus Expression System (Thermo Fisher Scientific). Briefly, recombinant Bacmid DNA were isolated from pFastbac-HisAGO2 or pFastbac-FlagMSI1 transformed DH10Bac cell, transfected into Sf9 insect cells to produce baculovirus. For isolating recombinant proteins, High Five insect cells were infected with gene-containing baculovirus for 48hr. The infected cells were harvested and washed in ice-cold PBS, lysed in Lysis buffer (20 mM Tris-HCl pH 7.9, 0.5 mM EDTA, 300 mM KCl, 10% Glycerol, 0.2% TritonX100, 10 $\mu$ M MG132) at 4°C for 30 min. Crude lysate were centrifuged at 13K rpm (20000 xg) and recombinant proteins were isolated by Nickel (Quiagen) or anti-FLAG M2 (Sigma) resins and eluted in Lysis buffer (with 100 mM KCl) containing 100 mM imidazole or 150  $\mu$ g/mL 3X FLAG peptide, respectively. For pull-down assay, 2  $\mu$ g HisAGO2 and 2  $\mu$ g FLAG-MSI1 were incubated as indicated in lysis buffer (with 100 mM KCl) at 4°C for 2 h before pull-down by Protein A-immobilized anti-AGO2 antibody. After extensive wash with lysis buffer (100 mM KCl), the precipitated proteins were separated by gel electrophoresis and analyzed by immunoblotting with indicated antibodies.

## **RNA-binding protein immunoprecipitation (RIP)**

Magna RIP kits (Millipore, Merck Co., Berlin, Germany, Catalog No. 17-700) [5] was used for RNA-binding protein immunoprecipitation and RNA extraction. The 05MG cells were washed twice with ice-cold PBS and cells were collected with 10 ml PBS by cell scraper. Collected cells were pelleted with 10-min centrifugation by 1500 rpm at 4°C. The pellets

were then resuspended in an equal volume of RIP lysis buffer (RIP lysis buffer (CS203176), protease inhibitor Cocktail (CS203220) and RNase Inhibitor (CS203219). The magnetic beads were prepared with 2.5 µl antibody for 30 minutes at room temperature, and the protein lysates were mixed with beads-antibody complex in 900 µl of RIP immunoprecipitation buffer (35 µl of 0.5M EDTA (CS203175), 5 µl RNase inhibitor and 860 µl RIP wash buffer (CS203177)) overnight with rotating at 4°C. The beads were washed thrice by ice-cold RIP wash buffer prior to the RNA isolation, followed by the RNA purification by performing proteinase K digestion at 55°C for 30 mins with vigorous shaking. The supernatant was placed into a new tube and add 250 µl RIP wash buffer. Equal volume of phenol: chloroform: isoamyl alcohol (25:24:1) was added for RNA isolation. Vortex for 15 seconds and centrifuge at 14000 rpm for 10 mins to separate the phases. Move 350 µl of the aqueous phase into new tube and add 400 µl of chloroform. Vortex for 15 seconds and centrifuge at 14000 rpm for 10 mins. Remove 300 µl the aqueous phase into new tube and add 50 µl Salt Solution I (CS203173), 15 µl Salt Solution II (CS203185), 5 µl of Precipitate Enhancer (CS203208) and 850 µl absolute ethanol and freeze the samples at -80°C overnight. At the very next day, each sample was centrifuged at 14000 rpm for 30 mins, removed supernatant, and washed pellets with 80% ethanol and centrifuge at 14000 rpm for 15 mins. Removed supernatant and air dry the pellets. The isolated RNAs were then resuspended in 20 µl of RNase-free waster (CS203217). All the antibodies and PCR primers used in this section were listed in Table S 7 [6].

### **Modified RNA-binding protein immunoprecipitation (modified-RIP)**

We used RNA ChIP-IT kit (Catalog No. 53024) [7] for a modified-RIP assay to study the interaction regions of RNA-binding proteins on their target RNAs. Add 175 µl of 37% formaldehyde per 6.5 ml medium of sample in culture dish (final concentration has to be

approximately 1%) for 5 mins to fix the samples. Then add 825  $\mu$ l Glycine to the sample (final concentration has to be 0.125M) for 5mins at room temperature to stop fixation. Remove the supernatant and discard. Washed the cell pellet and collected by centrifugation at 1000rpm for 5 mins at 4°C. Resuspend cells in ice-cold Complete Lysis Buffer, incubate on ice for 30 mins and transfer the cell by centrifugation at 5000rpm for 10 mins at 4°C. Remove the supernatant and resuspend the pellet in complete shearing buffer. Submit the samples to sonication to shear the chromatin using the Bioruptor® for 1 to 4 run of 5 cycles: [30 seconds “ON”, 30 seconds “OFF”] each (20 cycles). Spin the control and sonicated samples at 12,000 rpm for 10 minutes. The supernatant, except the upper lipid layer, is collected. Treat the chromatin with 10 $\mu$ l DNase I for 20 mins at 37°C and stop the reaction by adding 10 10 $\mu$ l 0.5M EDTA before performing the IP.

First, the Dynabeads Protein-G was incubated with 2.5 $\mu$ l antibody 30 minutes at 4°C. Next, the protein lysis 1mg incubated with protein-G-conjugated-antibody beads overnight at 4°C for parental cells. Dynabeads Protein-G was separated by Complete RNA-ChIP Elution Buffer by rotate for 15 mins in the end-to-end rotor at room temperature. Transfer the supernatants and add 2 $\mu$ l 5M NaCl and 2 $\mu$ l proteinase K to each sample for 1h at 42°C to digest the proteins. Then, incubate for 1.5 hrs at 65°C to reverse the cross-links. RNA was extracted with phenol/chloroform/isoamyl alcohol, dissolved in 20  $\mu$ l of KAPA distilled water, and used as a source of RNA for End point RT-PCR analysis (KAPA SYBR FAST Universal One-step qRT-PCR kit, KR0393). Each experiment was done in three distinct biological replicates. Quantification of fold changes of the signals was done by normalizing to IgG-precipitated controls. All the antibody and PCR primer were followed Table S 7 and 8.

### **RNA-Fluorescence in situ hybridization (RNA-FISH)**

The cells were sub-cultured on 18 mm around coverglass in a 12-well cell culture plate 24h. After overnight cultured, cells were stimulated hypoxia. The cells were fixed with 3.7 %

formaldehyde for 5 mins. Permeabilized with 0.1% Triton X-100 for 5 mins at room temperature. The immune-stained with the indicated primary antibodies in hybridization buffer (Biosearch Technologies Cat#SMF-HB1-10) overnight at 4°C, respectively, followed by FITC-labeled or PE-labeled secondary antibodies in wash buffer A (Biosearch Technologies Cat#SMF-WA1-60). Finally, DAPI nuclear stain (wash Buffer A of 5ng/mL DAPI) to counterstain the nuclei that allowed imaging. The antibody used in this study was listed in Table S 7 and the RNA FISH probes as below: Human TP53 with Quasar 670 Dye (Cat.VSMF-2423-5) and Human CCND1 with Quasar 670 Dye (Cat.VSMF-2047-5) [8].

### **Immunofluorescence (IF) staining**

Cells were sub-cultured on glass coverslips or chamber slides 24 hrs prior to the experiment. Cell were then subjected to undergo hypoxia with designated time in complete culture medium. The cells were fixed with 4 % paraformaldehyde for 10 mins. Permeabilized with 0.1% Triton X-100 for 10 mins and incubated with blocking buffer (5% BSA) for 1 hour at room temperature. The immune-stained with the indicated primary antibodies overnight at 4°C, respectively, followed by FITC-labeled or PE-labeled secondary antibodies for imaging. The secondary antibodies used in this study were listed in Table S 8.

### **Fluorescence resonance energy transfer (FRET) assay**

The plasmids who generate fluorescent fusion protein, MSI1-pmOrange and AGO2-EGFP [9], were co-transfected into GBM cells. Twenty-four hours after transfection, cells were stimulated with hypoxia. The cells were washed twice with ice-cold PBS and fixed using 4 % paraformaldehyde for 10 mins. Photo-bleaching was performed by 514-nm wavelength laser exposure at the maximal intensity. An excitation wavelength of 488 nm and an emission wavelength of  $520 \pm 20$  nm were used for GFP, and an excitation wavelength of 555 nm and an emission wavelength of  $580 \pm 20$  nm were used for mOrange spectrum. The

FRET energy transfer efficiency ( $E_f$ ) was calculated as  $FRET_{eff} = (I_{post} - I_{pre}) / I_{post}$  where  $I_{pre}$  and  $I_{post}$  are the total fluorescence of the ROI before and after bleaching [10].

### **Liquid chromatography–mass spectrometry (LC-MS/MS) analysis**

LC-MS/MS analysis was performed through the application of LTQ Orbitrap (Thermo Fisher Scientific Inc., Waltham, MA, USA) as previously described. In brief, each sample of digested peptides was reconstituted to 20  $\mu$ l of 0.1% formic acid (FA). Peptides were firstly injected in and separated by the nanoflow HPLC (Agilent 1100, Agilent Technologies, Santa Clara, CA, USA) with a C18 column (75  $\mu$ m ID  $\times$  360  $\mu$ m OD  $\times$  15 cm; Agilent Technologies, Santa Clara, CA, USA), and became ionized particles once passed through the succeeding nanospray tip (New Objective, Woburn, MA). In operating HPLC, the flow rate was at 0.4  $\mu$ l/min after a splitter. LC gradient for the LC-MS/MS system ramped from 2% ACN to 40% ACN in 120 min, and the system was performed under the setting of automated data-dependent acquisition, with mode of 200-2000 m/z full scan for the maximum 3 most intense peaks from each Orbitrap MS scan. Peptides with +2 or +3 charge state were further subjected to CID. Spectra were obtained in raw data files with Xcalibur (version 2.0 SR2). Protein identification was accomplished via TurboSEQUEST (Thermo Finnigan, San Jose, CA, USA) using the UniProt database. A protein was confirmed once 3 peptides with Xcorr > 2.5 were matched in sequencing [11]. The peptide sequences identified by Mass Spectrometry of the top 5 stress response-related proteins (Suppl. Figure 4b) are listed in Table S 1.

### **Split luciferase reconstitution reporter assay**

To use gaussian luciferase (Gluc) for detecting protein-protein interaction, we split gaussian luciferase into NGluc (N-terminal Gluc, 106 a.a.) and CGluc (C-terminal Gluc, 79 a.a.) [12, 13]. The two fragments were amplified by polymerase chain reaction (PCR) and subjected

to construct fusion protein with MSI1 and AGO2 by the pcDNA 3.1 and pCMV backbone, respectively. Each fusion protein contains a flexible linker (GGGGS)<sub>2</sub> between the protein and polypeptides of split luciferase [14, 15]. Stable cell lines were obtained by stable transfection of both fusion protein expressive plasmids in 05MG GBM cell line with Hygromycin B (Sigma Aldrich Co., St. Louis, MI, USA) and G418 sulfate (Merck Co., Berlin, Germany). To establish a normalizing standard, we transduced multiple reporter genes into the aforementioned stable cell line for stably expressing green fluorescent protein (GFP), firefly luciferase (FLuc) and herpes simplex virus type I thymidine kinase (HSV1-tk) using lentivirus as previously described [16]. For in vitro study, the cells were lysed in mild reporter lysis buffer (Promega Co., Madison, WI, USA) with a frozen-thaw cycle. The supernatant was collected after brief centrifugation and dispensed in 96-well black flat bottom plate. Coelenterazine (Nanolight Technologies, Ltd., Pinetop, AZ, USA), the substrate of GLuc, was firstly dissolved in methanol and diluted in reporter assay buffer (15 mM potassium phosphate, 25 mM glycylglycine, 15 mM MgSO<sub>4</sub>, 4 mM EDTA). D-luciferin sodium salt (Promega Co., Madison, WI, USA) was dissolved in sterilized water and diluted in reporter assay buffer supplemented with 2mM ATP. The bioluminescent signals were acquired by Wallac 1420 Victor<sup>2</sup> Microplate Reader (Perkin Elmer, Waltham, MA, USA) equipped with auto-dispenser to avoid rapid decay of GLuc. For in vivo study, the xenografted mice were anesthetized by isoflurane inhalation (1% in O<sub>2</sub> supplement) prior to the In Vivo Imaging System (IVIS 50, PerkinElmer, Waltham, MA, USA) acquisition. The coelenterazine was injected through tail vein for a total of 15 µg per mouse, and the image was acquired within 5 minutes. The mice would be recovered from luminescent status for 30-minute rest; after that, the mice would undergo an intraperitoneal injection of D-luciferin (150 mg/kg) for tumor size normalization. The region of interests (ROI) was automatically chosen by the Living Image 4.2 software and quantified as photon flux in a certain area per second (photons/s/cm<sup>2</sup>).

## **Immunohistochemistry staining and immunoblotting (IHC)**

Tumor specimens from mice were fixed with 4% paraformaldehyde (Sigma Aldrich Co., St. Louis, MO, USA). Sections were deparaffinized and rehydrated before staining. Tissue antigen was retrieved by boiling in 10 mmol/L (pH 6) citrate buffer (Sigma Aldrich Co., St. Louis, MO, USA) for 10 mins. Sections were cooling down in PBS for 10 mins before treating with 3% H<sub>2</sub>O<sub>2</sub>. Samples were blocked in 5mg/ml BSA (Sigma Aldrich Co., St. Louis, MO, USA) in PBS for 30 mins before hybridizing with 100 dilute primary antibodies. Signals were amplified by the TSA Biotin System (PerkinElmer, Waltham, MA, USA) as instructed by the manufacturer and then counterstained with hematoxylin (Sigma Aldrich Co., St. Louis, MO, USA, #201708) for 30 mins [17]. The antibodies used in this study were listed in Table S 8.

## **Laser capture microdissection (LCM)**

Serial sections (n=3–20, 8 µm) were cut from each formalin-fixed paraffin-embedded (FFPE) sample and stored at 4°C until use. A 4-µm thick section was cut for H&E staining. Immediately before LCM, the sections were deparaffinized, stained with hematoxylin for 1 minute, dehydrated through alcohol gradients for 30 seconds each, and finally immersed in xylene for another 3 minutes and air-dried. The microdissection was performed using ArcturusXT Laser Capture Microdissector (Applied Biosystems-Life Technologies, Carlsbad, CA, USA) following the manufacturer's instrument. AutoScan™ analysis software module was implemented when using the ArcturusXT LCM instrument, which allowed the user to visually inspect the regions of interest. Approximately 5000 cells were captured per specimen and subsequently used for the following studies. Two 5-µm-thick sections were cut from each block and placed in sterile 1.5-mL centrifuge tubes for extraction. Tubes containing cut FFPE sections for RNA purification were stored at -80°C until use. Total RNA including small RNAs was extracted using FFPE RNA Isolation Kit (Life Technologies

Corporation, Carlsbad, CA, USA) following the instruction. RNA yield was determined from the A 260/A 280 absorbance ratios using a NanoDrop ND-1000 spectrophotometer (Thermo Fisher Scientific, Waltham, MA, USA).

### **Statistical analysis**

Data are expressed as the mean  $\pm$  SD from at least three independent experiments. The statistical analysis was performed using student's T-test. Difference were considered significant when  $p \leq 0.05$  or  $p \leq 0.01$ .

### **Data Availability**

Authors can confirm that all relevant data are included in the article and/or its supplementary information files.

## SUPPLEMENTARY TABLES

**Table S1. List of Peptide Sequences of the Top 5 Stress Response-related Proteins Identified from Mass Spectrometry**

| Gene Name | Protein Name                                                           | Peptide Sequence From Proteomic                                                                                                                                                                                                                                                                                       |
|-----------|------------------------------------------------------------------------|-----------------------------------------------------------------------------------------------------------------------------------------------------------------------------------------------------------------------------------------------------------------------------------------------------------------------|
| PABPC1    | Polyadenylate-binding protein 1 (PABP1)                                | DLFGK/QIYVGR/FGPALSVK/PASSQVPR<br>/AVTEMNGR/SGVGNIFIK/AVNSATGVPTV/PLYVALAQR<br>/GFGFVSFER/MNGMLLNDR/YQGVNLYVK/MNGMLLNDR<br>/PAAAAAATPAVR/FSPAGPILSIR/NLDDGIDDER/NFGEDMDDER<br>/ALDTMNFDVIK/VANTSTQTMGPR/ALDTMNFDVIK/EFSPFGTITSAK<br>/QAHLTNQYMQR/VDEAVAVLQAHQAK/GFGFVCFSSPEEATK<br>/GYGFVHFETQEEAER/SLGYAYVNFQQPADAER |
| EIF2AK2   | Interferon-induced, double-stranded RNA-activated protein kinase (PKR) | GVDYIHSK/DGIISDIFDK/IGDFGLVTSK/DGIISDIFDKK<br>/DLKPSNIFLVDTK/LTVNYEQCASGVHGPEGFHYK<br>/RLTVNYEQCASGVHGPEGFHYK/AVSPLLTTTNSSEGLSMGNYIG<br>LINR                                                                                                                                                                          |
| GCN       | eIF-2-alpha kinase activator GCN                                       | GAAYGLAGLVK/ALADENEFVR/ASLLDPVPEVR/YLLDSCAPLLR                                                                                                                                                                                                                                                                        |
| EIF3A     | Eukaryotic translation initiation factor 3 subunit A                   | ELEIEER/LESLNIQR/IGLINDMVR/NICQQVNIK                                                                                                                                                                                                                                                                                  |
| EIF2C2    | Protein argonaute-2 (AGO2)                                             | YCATVR/TPVYAEVK/SGNIPAGTTVDTK/NLYTAMPLPIGR                                                                                                                                                                                                                                                                            |

**Table S2. Clinical manifestation and background of 18 GBM patients with primary and recurrent tumors.**

| Recurrent GBM       |          |
|---------------------|----------|
| No. of patients     | 18       |
| Age (years)         | 62.1±5.7 |
| Female              | 16       |
| Survival (months)   | 4.1±0.2  |
| KPS                 |          |
| ≥80                 | 0        |
| <80                 | 18       |
| P53 mutation        | 14       |
| MGMT methylation    | 11       |
| Surgery             |          |
| Total gross removal | 18       |
| Subtotal removal    | 0        |
| No surgery          | 0        |
| Radiation           | 18       |
| Treatment           | with 18  |
| Temodal®            |          |

**Table S3. Clinical manifestation and clinical background of a cohort of 67 primary and 32 recurrent GBM patients.**

|                     | <b>GBM</b> | <b>Recurrent GBM</b> |
|---------------------|------------|----------------------|
| No. of patients     | 67         | 32                   |
| Age (years)         | 60.2±6.5   | 64.6±5.1             |
| Female              | 30         | 18                   |
| Survival (months)   | 15.3±1.6   | 6.2±1.1              |
| KPS                 |            |                      |
| ≥80                 | 29         | 0                    |
| <80                 | 38         | 32                   |
| P53 mutation        | 60         | 25                   |
| MGMT methylation    | 41         | 19                   |
| Surgery             |            |                      |
| Total gross removal | 65         | 31                   |
| Subtotal removal    | 0          | 0                    |
| No surgery          | 2          | 1                    |
| Radiation           | 67         | 32                   |
| Temodal®            | 67         | 32                   |

**Table S4. Clinical manifestation and clinical background of a cohort of 61 recurrent PDAC patients.**

|                   | Non-recurrent | Recurrent |
|-------------------|---------------|-----------|
| No. of patients   | 18            | 61        |
| Age (years)       | 64.6±12.4     | 67.8±13   |
| Sex               |               |           |
| Female            | 6             | 22        |
| Male              | 12            | 39        |
| Survival (months) |               |           |
| DFS               | 62.87         | 10.3      |
| OS                | 88.9          | 21        |
| AJCC TNM status   |               |           |
| Stage 0           | 0             | 0         |
| Stage IA          | 2             | 0         |
| Stage IB          | 3             | 7         |
| Stage IIA         | 8             | 14        |
| Stage IIB         | 5             | 37        |
| Stage III         | 0             | 3         |
| Stage IV          | 0             | 0         |

**Table S5. List of the primers used for plasmid construction**

| Name            | Sequence (5'-3')                                  |
|-----------------|---------------------------------------------------|
| MSI-F           | ATGGAGACTGACGCGCCCCAGCCCG                         |
| MSI1-R          | TCAGTGGTACCCATTGGTGAAGGCT                         |
| MSI1-F-HindIII  | AGAAGCTTATGGAGACTGACGCGCCCCAGC                    |
| MSI1-R-BamHI    | AGGATCCTCAGTGGTACCCATTGGTGAAGG                    |
| MSI1-NLS-MutA-F | CGGGACCCCCTGACCGCAGCATCCGCAGGTTTCGGCTTCGTC        |
| MSI1-NLS-MutA-R | GACGAAGCCGAAACCTGCGGATGCTGCGGTCAGGGGGTCCCG        |
| MSI1-NLS-MutB-F | CCCAAGATGGTGACTGCAACGGCAGCAATCTTTGTGGGGGGGCTGTCTG |
| MSI1-NLS-MutB-R | CGACAGCCCCCCCCACAAAGATTGCTGCCGTTGCAGTCACCATCTTGGG |
| MSI1-NES-Mut-F  | CCAGTCCTCCCCGAGGCAACAGCCGCACCTGCAACTGCCTACGGACCA  |
| MSI1-NES-Mut-R  | TGGTCCGTAGGCAGTTGCAGGTGCGGCTGTTGCCTCGGGGAGGACTGG  |
| MSI1-C-term-F   | ATCGAAGCTTTGCCCTACGGAATGGACGCC                    |
| MSI1-C-term-R   | TAAGGGATCCTCAGTGGTACCCATTGGT                      |
| MSI1-F-Hind III | AATTAAGCTTATGGAGACTGACGCGCCCCAG                   |
| MSI1-R-BamHI-T1 | TTAAGGATCCAACCTGCTGACCCCCGAGTCC                   |
| MSI1-R-BamHI-T2 | TTAAGGATCCATGGCTGTAAGCTCGGGG                      |
| MSI1-R-BamHI-T3 | TTAAGGATCCAACCTCCGGCTGGCGTAGG                     |
| MSI1-R-BamHI-T4 | TTAGGATCCCCGTTGGCGACATCACCT                       |

**Table S6. Sequences of the primer used for real-time PCR analysis**

| Gene Name      | Forward sequence           | Reverse sequence              |
|----------------|----------------------------|-------------------------------|
| MSI1           | TTG ACA AAA CCA CCA ACC GG | CCT CCT TTG GCT GAG CTT TCT T |
| p21            | AGTACCCTCTCAGCTCCAGG       | TGTCTGACTCCTTGTTCCGC          |
| TP53           | GGCAGGAAGGCTCCAGATG        | CCTCACTGTTTCATATGCCCATTC      |
| CCND1          | GAAGTTGCAAAGTCCTGGAGC      | TGGTTTCCACTTCGCAGCA           |
| CDK4           | TCGTGAAAGCCTCTCTTCTG       | AGGCAGAGATTGCTTGTGT           |
| BIRC5          | GAATTCCGGGACCCGTTGG        | CCAAGTCTGGCTCGTTCTCA          |
| Akt1           | GCAGCACGTGTACGAGAAGA       | CCTCCAAGCTATCGTCCAGC          |
| MBP            | CCAGGATTTGGCTACGGAGG       | TAGGTAACAGGGGCAAGTGG          |
| TMBIM6         | AGGCGGGTTAGGAAGAGTGG       | GACCATATGGACATAGGCCCC         |
| cdc20          | TGGGTTCTCTGCAGACATTC       | GCTCCTTGTAATGGGGAGACC         |
| cdc6           | CAGTTCAATTCTGTGCCCGC       | GCTCCTTCTTGGCTCAAGGT          |
| Hells          | TTCCCGGGTGAGTGTCCAG        | TATCCCAAGACATGCGAGCC          |
| DLGAP5         | TTCTTGCTGGTGGAGTAGCAG      | TAGACCTGGTGAATCAAGAAGG        |
| DCTN1          | ACTGAAGCCTAAGAAGGCACC      | CTCCAGGAGAGGTGAGGACC          |
| $\beta$ -actin | GCGTGACATTAAGGAGAAG        | GAAGGAAGGCTGGAAGAG            |
| GAPDH          | AGAAGGCTGGGGCTCATTTG       | AGGGGCCATCCACAGTCTTC          |
| 18S rRNA       | CAGCCACCCGAGATTGAGCA       | TAGTAGCGACGGGCGGTGTG          |
| Septin 11      | CTAATAAAGCGGGAGGGGCG       | GTCCTATTTAGTAGTACAGACGC       |
| Septin 2       | GTGGTGGGCTAGACGAGTTTC      | CTTGCGGTGGGTAAGTGGAG          |
| ACTN4          | GGCACAGACCAGAGCTGATT       | TCCAGCATCTTGGGGATGTC          |
| ALDH1A3        | TCGACCTGGAGGGCTGTATTA      | CAGGACCATGGTGTTCAC            |
| ANXA5          | ACCTGCCTACCTTGACAGAGA      | CTTCCCCGTGACACGTTAGT          |
| ARHGEF12       | AAAGGAGGACCTCTCGCCAA       | GCTGAACAAGACCTGTGGGG          |
| BCAT1          | TGATGCAATCCGCTAGGTCG       | GCATCCGTTACTGCAATCCTTC        |
| BCL2L1         | GAAACGACCTGGCCGATGAA       | GCTCCCGGTTACTCTGAGAC          |
| CALM1          | CAGTGGTGCTGGGAGTGTC        | GATCAGCCATGGTGCGAGC           |
| CALM2          | AGGGAGGTGTTTATGAGGCG       | ACAAAGCTAACCATGCTGCAA         |
| CALM3          | GATGCAGATGGGAACGGGA        | AAAGACACGGAACGCCTCTC          |
| CFL1           | CTCATTGTGCGGCTCCTACTAA     | AGAAGAGCACCGCCTTCTTG          |
| CUL4B          | GCAGAATCAGAATGTTCCGGG      | CCTGGAGTTCCTTTTACCCTCT        |
| DAPK3          | AATCTGAGGAGCTGGGTTGC       | TGATGAACTTGGCTGCGTACT         |
| DCTN2          | TCGATGCGTTTGCACAAGA        | CTGGGGTGCTCCTTCACTC           |

|           |                          |                        |
|-----------|--------------------------|------------------------|
| DNAJC5    | CCTATCGGAAGCTTGCCTTGA    | CAGCTGGACAGCACGAAGTA   |
| EID1      | CTGGATGGCGGGTTTCAGAT     | AGTTGGGTCCCTCCTCAAGT   |
| EIF4G2    | CCATTCGGGGAGACTCTGGT     | ACCTCCATAGAGCTCCGACT   |
| EIF5A     | GCTCGGGTCCTAATCACCCC     | TGCATCTCCTGTCTCGAAGTC  |
| GPX1      | TTTGGGCATCAGGAGAACGC     | CAACATCGTTGCGACACACC   |
| GSTP1     | AGACCAGATCTCCTTCGCTGA    | TCACTGTTTCCCGTTGCCAT   |
| IRAK1     | GAGTGGCTTTGAGAAGCACC     | TCTAGCCTCTCGTACACCTGG  |
| LGALS1    | CTGGAAGTGTTGCAGAGGTGT    | CCGTCAGCTGCCATGTAGTT   |
| MACF1     | GATCTTACAGGAGCGAGCGG     | TGTGCTTGCGGACCTTCATT   |
| MAPRE1    | TTCTGCCGAGAGCCGAAGA      | TTCAAGGCAATGGAGCCAGG   |
| MCL1      | TTCCAGTAAGGAGTCGGGGT     | CCTCCTTCTCCGTAGCCAAA   |
| MDM2      | CAGCAGGAATCATCGGACTCA    | TGTGGCGTTTTCTTTGTCGT   |
| MFN2      | GAAGGTGAAGCGCAATGTCCC    | GTTCTTCTGTGGTAACGGGGT  |
| NACC1     | CTTCTTTGACCGGAACACGC     | AGTACTTGACAGCGTGGAGC   |
| NME1-NME2 | AAGGAACCATGGCCAACTGT     | AGATCTTCGGAAGCTTGCAT   |
| NPM1      | ACTCCAGCCAAAAATGCACA     | CATGTAGTGCCCAGGACTGT   |
| NPM1      | CGGTTGTGAACTAAAGGCCG     | TTTGCACCAGCCCCTAAACT   |
| PAFAH1B1  | ACGAGATGAACTAAATCGAGCTAT | TGACCAAGAGGTCCACCTGA   |
| PPP1CB    | AGCTCATCAGGTGGTGAAGA     | CGGAGGATTAGCTGTTGAGG   |
| PRC1      | ACCTATTCTGAGTTTGCGAAGGA  | TGATCAGGGCTTCTCAGGACT  |
| PRDX1     | CCCCACGGAGATCATTGCTT     | AAAGGCCCTGAACGAGATG    |
| PSMB7     | TTCCCAGAGTTGTGACAGCC     | GCCAGAACCCATGGTGACAT   |
| PSMD2     | CGCGAGTTGGTCTGGGAAAA     | CCTCTTCAGACAGCTCCTGTTC |
| RCC2      | AAGTGTATCTGGTGAGTGGGC    | GGAGTGATGAGAAACCGGAGA  |
| RHOA      | CGTTAGTCCACGGTCTGGTC     | ACCAGTTTCTTCCGGATGGC   |
| RNA       | TTCTGGAAGGAACGCCGC       | TGGTGTGGAACACTAGGGGA   |
| RPL11     | GAAGGGTCTAAAGGTGCGGG     | ATGCTGAAACCTGGCCTACC   |
| RPS3      | GCGAGTTACACCAACCAGGA     | CCCTCTGGAAAGCCAAACCT   |
| RPS6      | AAGCACCCAAGATTCAGCGT     | TAGCCTCCTTCATTCTCTTGGC |
| RRM2B     | GTAGCTTCGGCGGAGTCTG      | AGTCGACCTCTTCTGCTGTC   |
| S100A6    | CGACCGCTATAAGGCCAGTC     | GCAGCTTCGAGCCAATGGT    |
| SOD1      | ACAAAGATGGTGTGGCCGAT     | AACGACTTCAGCGTTTCCT    |
| SPIN1     | GGGTGGAAAGAGGGGAATGG     | TGTGCATCGCTGATTCGAGA   |
| SQSTM1    | CCGTGAAGGCCTACCTTCTG     | TCCTCGTCACTGGAAAAGGC   |
| STMN1     | CCATTGTCTGAAGGGACGGG     | GACAAGCGACAGGCAGTGTA   |

|       |                        |                        |
|-------|------------------------|------------------------|
| TGM2  | AGTCCCTGGAAATGCCAGCC   | TGTCTACACTGGCCTCGTAGT  |
| TPT1  | AGGGGCTGCAGAACAAATCA   | AGACAGAAAGCGCAGGGATT   |
| TUBB  | GCGCTTATCGAAGTGTGGTC   | TTCCCCTAGACACTCGCTCC   |
| UBC   | AGTAGTCCCTTCTCGGCGAT   | GACGATCACAGCGATCCACA   |
| UHMK1 | ATTTCGGCTTCTGGGACTC    | CCATCGGTGTGGGTTAAGGG   |
| USP22 | CCCATCTTTGTCCGGCCTC    | CCAGTTGTCCACCTTGAAGC   |
| YWHAE | GGGTGACGGTGAAGAGCAGAA  | TCAGTGACAATGGGGAGTTTCC |
| ZWINT | CTCCAGCTTCTGTATACCCTGC | AGTCAGAGGCCTTTTCTAGGAT |

**Table S7. Sequences of the primer used for modified-RIP assay.**

|               | Forward sequence       | Reverse sequence       |
|---------------|------------------------|------------------------|
| TP53-3'UTR-1  | CTGAACAAGTTGGCCTGCAC   | GGGACAGCTTCCCTGGTTAG   |
| TP53-3'UTR-2  | GGCCCACTTCACCGTACTAA   | AGGGAACAAGCACCCCTCAAG  |
| TP53-3'UTR-3  | GGTCGGTGGGTTGGTAGTTT   | AGTCTTGGTGGATCCAGATCAT |
| TP53-3'UTR-4  | ACCCTGTCTGACAACCTCTTGG | AGGCAGAGATTTCGCTTGTGT  |
| TP53-3'UTR-5  | ACCCTGTCTGACAACCTCTTGG | ATGAACCTGTGGTCCCAGCT   |
| TP53-3'UTR -6 | GCCACCATGGCCAGCCAACT   | CACCCCTCAGACACACAGGT   |
| TP53-CDS-1    | TGAAGCTCCCAGAATGCCAG   | GCTGCCCTGGTAGGTTTTCT   |
| TP53-CDS-2    | TGTGACTTGCACGTACTCCC   | ACCATCGCTATCTGAGCAGC   |
| TP53-CDS-3    | GACATAGTGTGGTGGTGCCC   | ACAAACACGCACCTCAAAGC   |
| TP53-UTR-4    | TTTGAGGTGCGTGTTTGTGC   | CCCACGGATCTGAAGGGTGAA  |
| TP53-UTR-5    | TTCACCCTTCAGATCCGTGG   | CAGTGGGGAACAAGAAGTGGA  |
| NF2-3'UTR-1   | AGAGCTCTAGCAGGTGACCC   | CAGGTCAGAGAACTAGAACGCC |
| NF2-3'UTR-2   | ATGGCGTTCTAGTTCTCTGACC | ATGATGGCACTGGCTTCTCA   |
| NF2-3'UTR-3   | GAACATTCATTCCCCACCG    | CGAGTGCCCTGTACCATCAG   |
| NF2-3'UTR-4   | TGGCTGGGGAGAGACTTTAG   | CACACAGGAAGGAGCGTCTAT  |
| NF2-3'UTR-5   | CGCCCATAGACGCTCCTTC    | CAAAGTGAGGCCTGGGTACAA  |
| NF2-3'UTR-6   | TTGTACCCAGGCCTCACTTTG  | GCCCCAGACCAAGGAGTGAG   |
| NF2-3'UTR-7   | TTTTCTCCATGGCTGATGCTG  | AGCAGCCCAACCCCATTAG    |
| NF2-3'UTR-8   | CTGACCTAATGGGGTTGGGCT  | AGAGCCAGACCTCACTTTACAA |
| NF2-3'UTR-9   | TCAGTCTTGAAGCCCATCCCT  | CTTGGCACTTCCCAGACTTCA  |
| NF2-3'UTR-10  | CTGAAGTCTGGGAAGTGCCAA  | TCCTGCTACTGGGGCTTGAG   |
| NF2-3'UTR-11  | TAGGGCCTGGGAGTTTGCA    | GATGAACGAAGCCATCTGTGC  |
| NF2-3'UTR-12  | CCCCCAACCTGTGTTGTCC    | GCAGCTGGTTGTCAGTCTCTG  |
| NF2-CDS-1     | GACGCCGAGATGGAGTTCAA   | TGAAAGGTGACTGGTTCTTCCT |
| NF2-CDS-2     | CAGTGTTCAACAAGCGGGGAT  | CACACCGTACATCTCCAGGTC  |
| NF2-CDS-3     | TCCCGTGGAATGAAATCCGA   | GCTGAACTTCCAAAGAATCGGC |
| NF2-UTR-4     | TTGGCTGAAAAGGCCAGAT    | TGCTTCAGCTGATCTGCCTC   |
| NF2-UTR-5     | TGACATGAAGCGGCTTTCCA   | ACCCCTGTCGGAGTTCTCAT   |
| CCND1-3'UTR-1 | GCGTCTCGGGAGAGGATTAG   | GCCTAGAACCCCACTACAGC   |
| CCND1-3'UTR-2 | CCCACAGCTACTTGGTTTGTG  | TTTCTTCTTGAAGTGGCACGC  |
| CCND1-3'UTR-3 | CTGCGTGCCAGTCAAGAAGA   | ACCTTCCGGTGTGAAACATC   |

|               |                          |                          |
|---------------|--------------------------|--------------------------|
| CCND1-3'UTR-4 | GCAGAGGATGTTTCATAAGGCCA  | GATGACTCTGGGAAACGCCA     |
| CCND1-CDS-1   | CTGCGAAGTGGAACCATCC      | AAGACCTCCTCCTCGCACTT     |
| CCND1- CDS-2  | GCCATGAACTACCTGGACCG     | CAATGAAATCGTGCGGGGTC     |
| CCND1- CDS-3  | ACACTTCCTCTCCAAAATGCCA   | TGTGAGGCGGTAGTAGGACAG    |
| CCND1- CDS-4  | GTGATCAAGTGTGACCCGGA     | GCCCTCAGATGTCCACGTCC     |
| HELLS-3'UTR-1 | AAGTGGAGCTCAAGAATAGCTT   | TCTTTGTTCTTGGTAAGGCTCAGA |
| HELLS-3'UTR-2 | ACTGATTGTCCACTTCACCTTTTT | AGTACACATCAGCCTGTATCCAA  |
| HELLS-3'UTR-3 | TCTTGATACAGGCTGATGTGT    | TCTCTCCCCATGAAAAGCCT     |
| HELLS-3'UTR-4 | AGTGATTTCCCTGTATTGGGTTT  | TCTTTGTTCTTGGTAAGGCTCA   |
| HELLS-3'UTR-5 | ACAGGCTGATGTGTACTTAACCA  | GCATAATCCCAATCTCTCCCCA   |
| HELLS-CDS-1   | CAGCGGCGGCTCGGA          | CAGGTCAGAGAACTAGAACGCC   |
| HELLS-CDS-2   | TCGGTACCGTAGACTTCAACA    | TGTTGCTGTTCCATTTTCGTCA   |
| HELLS-CDS-3   | TCAGAGGTCATGTCAAAAGAGGA  | TCCTCTTTTGACATGACCTCTGA  |
| HELLS-CDS-4   | GACCCAGTCCGGAAGTGTA      | TACACTTCCGGACTGGGTCA     |
| HELLS-CDS-5   | TTGTCTGTGGCCCTTTGTCT     | TGTAGACAAAGGGCCACAGAC    |
| HELLS-CDS-6   | CTTTTGACTGGTACTCCCTTGC   | TCTGCAAAGTCCCTTTCCGT     |
| HELLS-CDS-7   | TCCACTTTCAAAGAAGCAGGAGA  | GGAAC TTCAAGAGCAACATCAGA |
| HELLS-CDS-8   | CCGAGAAAGAGCTGTTGTGGA    | ACAGCTCTTTCTCGGTCCAC     |
| HELLS-CDS-9   | AGGCTTGATGGGTCCATGTCT    | AAAAAGCAGCACCTTGTGACC    |
| HELLS-CDS-10  | ACCCCCAGTCGGATCTTCAG     | ATCCGACTGGGGGTTCCAA      |
| HELLS-CDS-11  | TTCAAAGGTGGTCAGTCTGGATT  | TCCCCATCTTCTCTTTAATTGGT  |
| HELLS-CDS-12  | GGACCAATTAAAGAGAAGATGGGG | TGTTCTTGGTAAGGCTCAGAAA   |



**Table S8. Antibody list**

| <b>ANTIBODIES</b>                                                        | <b>SOURCE</b>             | <b>IDENTIFIER</b> |
|--------------------------------------------------------------------------|---------------------------|-------------------|
| Rabbit monoclonal anti-Argonaute 2                                       | Cell Signaling Technology | Cat#2897;         |
| Mouse monoclonal anti-Argonaute 2                                        | abcam                     | Cat#ab57113       |
| Rabbit polyclonal anti-Argonaute 2                                       | abcam                     | Cat#ab32381       |
| Mouse monoclonal anti- $\beta$ -Actin                                    | SIGMA                     | Cat#a5316         |
| Mouse monoclonal anti-Cyclin D1                                          | abcam                     | Cat#ab6125        |
| Rabbit monoclonal anti-CDK4                                              | Cell Signaling Technology | Cat#12790         |
| Rabbit polyclonal anti-HELLS                                             | Cell Signaling Technology | Cat#7998          |
| Rabbit polyclonal anti-HIF-1 $\alpha$                                    | Cell Signaling Technology | Cat#3716          |
| Rabbit polyclonal anti-Lamin A/C                                         | Cell Signaling Technology | Cat#2032          |
| Rabbit monoclonal anti-Musashi-1                                         | Cell Signaling Technology | Cat#5663          |
| Rabbit monoclonal anti-Musashi-1                                         | abcam                     | Cat#ab52865       |
| Rabbit monoclonal anti-Merlin                                            | Cell Signaling Technology | Cat#12888         |
| Rabbit monoclonal anti-p53                                               | Cell Signaling Technology | Cat#2527          |
| Rabbit monoclonal anti- p21 Waf1/Cip1                                    | Cell Signaling Technology | Cat#2947          |
| Mouse monoclonal anti-Flag M2                                            | SIGMA                     | Cat#F1804         |
| Rabbit polyclonal anti-DDDDK tag                                         | abcam                     | Cat#ab1162        |
| Mouse polyclonal IgG                                                     | Millipore                 | Cat#12-371        |
| Rabbit polyclonal IgG                                                    | Millipore                 | Cat#12-370        |
| EasyBlot anti-mouse IgG                                                  | GeneTex                   | Cat#GTX225857-01  |
| EasyBlot anti-rabbit IgG                                                 | GeneTex                   | Cat#GTX225856-01  |
| Anti-mouse IgG, HRP-linked Antibody                                      | Cell Signaling Technology | Cat#7076          |
| Anti-rabbit IgG, HRP-linked Antibody                                     | Cell Signaling Technology | Cat#7074          |
| Goat anti-Mouse IgG (H+L) Secondary Antibody, Alexa Fluor 488 conjugate  | Invitrogen                | Cat#A-11001       |
| Goat anti-Mouse IgG (H+L) Secondary Antibody, Alexa Fluor 555 conjugate  | Invitrogen                | Cat#A-21424       |
| Goat anti-Rabbit IgG (H+L) Secondary Antibody, Alexa Fluor 488 conjugate | Invitrogen                | Cat#A-11008       |
| Goat anti-Rabbit IgG (H+L) Secondary Antibody, Alexa Fluor 568 conjugate | Invitrogen                | Cat#A-11036       |
| Human TP53 with Quasar 670 Dye (RNA Fish)                                | Biosearch Technologies    | Cat#VSMF-2423-5   |

|                                            |                        |                 |
|--------------------------------------------|------------------------|-----------------|
| Human CCND1 with Quasar 670 Dye (RNA Fish) | Biosearch Technologies | Cat#VSMF-2047-5 |
| Annexin V                                  | BD Pharmingen™         | Cat#556547      |
| DAPI                                       | SIGMA                  | Cat#D9542       |

## REFERENCES

1. Chiou GY, Chien CS, Wang ML, Chen MT, Yang YP, Yu YL, et al. Epigenetic regulation of the miR142-3p/interleukin-6 circuit in glioblastoma. *Molecular cell*. 2013; 52: 693-706.
2. Kawahara H, Okada Y, Imai T, Iwanami A, Mischel PS, Okano H. Musashi1 cooperates in abnormal cell lineage protein 28 (Lin28)-mediated let-7 family microRNA biogenesis in early neural differentiation. *J Biol Chem*. 2011; 286: 16121-30.
3. Roberts A, Pachter L. Streaming fragment assignment for real-time analysis of sequencing experiments. *Nat Methods*. 2013; 10: 71-3.
4. Langmead B, Trapnell C, Pop M, Salzberg SL. Ultrafast and memory-efficient alignment of short DNA sequences to the human genome. *Genome Biol*. 2009; 10: R25.
5. Keene JD, Komisarow JM, Friedersdorf MB. RIP-Chip: the isolation and identification of mRNAs, microRNAs and protein components of ribonucleoprotein complexes from cell extracts. *Nature protocols*. 2006; 1: 302-7.
6. Dahm GM, Gubin MM, Magee JD, Techasintana P, Calaluce R, Atasoy U. Method for the isolation and identification of mRNAs, microRNAs and protein components of ribonucleoprotein complexes from cell extracts using RIP-Chip. *Journal of visualized experiments : JoVE*. 2012.
7. Selth LA, Gilbert C, Svejstrup JQ. RNA immunoprecipitation to determine RNA-protein associations in vivo. *Cold Spring Harbor protocols*. 2009; 2009: pdb prot5234.
8. Raj A, van den Bogaard P, Rifkin SA, van Oudenaarden A, Tyagi S. Imaging individual mRNA molecules using multiple singly labeled probes. *Nature methods*. 2008; 5: 877-9.
9. Shen J, Xia W, Khotskaya YB, Huo L, Nakanishi K, Lim SO, et al. EGFR modulates microRNA maturation in response to hypoxia through phosphorylation of AGO2. *Nature*. 2013; 497: 383-7.
10. Karpova T, McNally JG. Detecting protein-protein interactions with CFP-YFP FRET by acceptor photobleaching. *Current protocols in cytometry / editorial board, J Paul Robinson, managing editor [et al]*. 2006; Chapter 12: Unit12 7.
11. Jiang BH, Chen WY, Li HY, Chien Y, Chang WC, Hsieh PC, et al. CHD1L Regulated PARP1-Driven Pluripotency and Chromatin Remodeling During the Early-Stage Cell Reprogramming. *Stem cells*. 2015; 33: 2961-72.
12. Kato N, Jones J. The split luciferase complementation assay. *Methods Mol Biol*. 2010; 655: 359-76.
13. Paulmurugan R, Umezawa Y, Gambhir SS. Noninvasive imaging of protein-protein interactions in living subjects by using reporter protein complementation and reconstitution strategies. *Proc Natl Acad Sci U S A*. 2002; 99: 15608-13.
14. Trinh R, Gurbaxani B, Morrison SL, Seyfzadeh M. Optimization of codon pair use within the (GGGGS)<sub>3</sub> linker sequence results in enhanced protein expression. *Mol Immunol*. 2004;

40: 717-22.

15. Newton DL, Xue Y, Olson KA, Fett JW, Rybak SM. Angiogenin single-chain immunofusions: influence of peptide linkers and spacers between fusion protein domains. *Biochemistry*. 1996; 35: 545-53.

16. Lin LT, Chiou SH, Lee TW, Liu RS, Hwang JJ, Chang CH, et al. A comparative study of primary and recurrent human glioblastoma multiforme using the small animal imaging and molecular expressive profiles. *Molecular imaging and biology : MIB : the official publication of the Academy of Molecular Imaging*. 2013; 15: 262-72.

17. Chien CS, Wang ML, Chu PY, Chang YL, Liu WH, Yu CC, et al. Lin28B/Let-7 Regulates Expression of Oct4 and Sox2 and Reprograms Oral Squamous Cell Carcinoma Cells to a Stem-like State. *Cancer research*. 2015; 75: 2553-65.

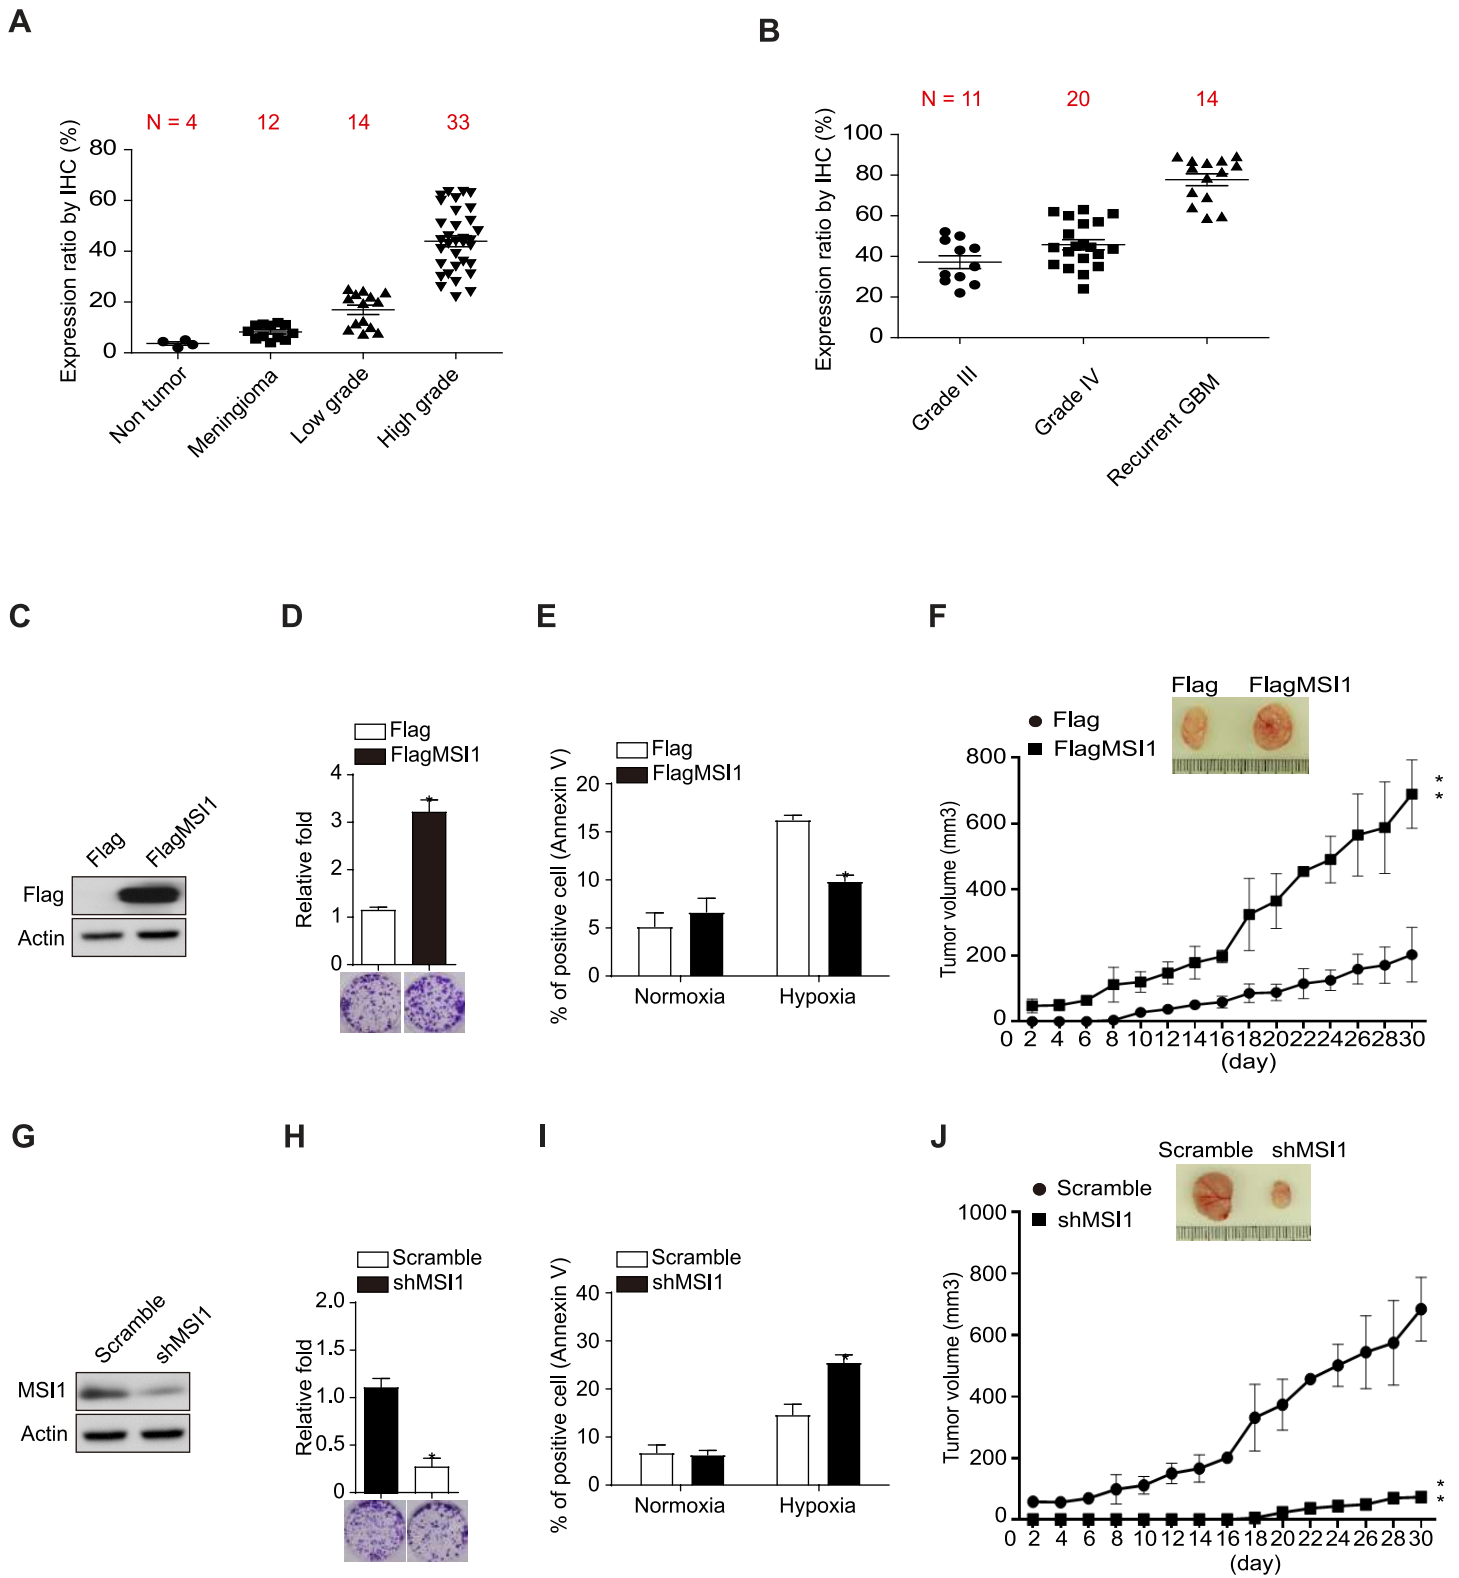

A

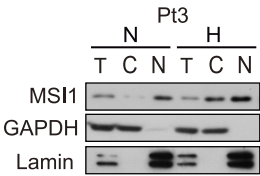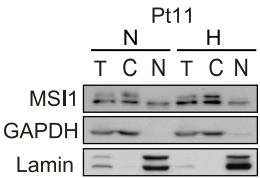

C

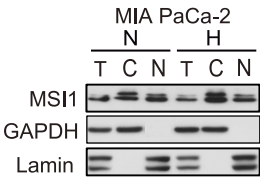

E

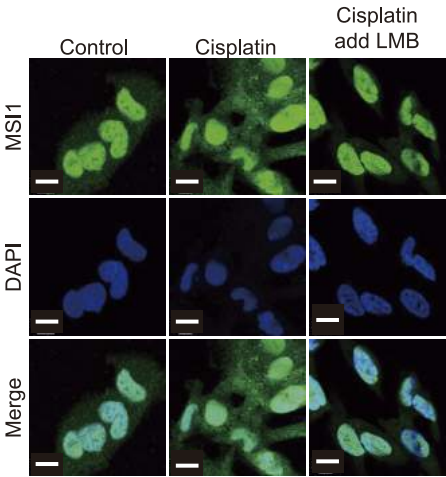

B

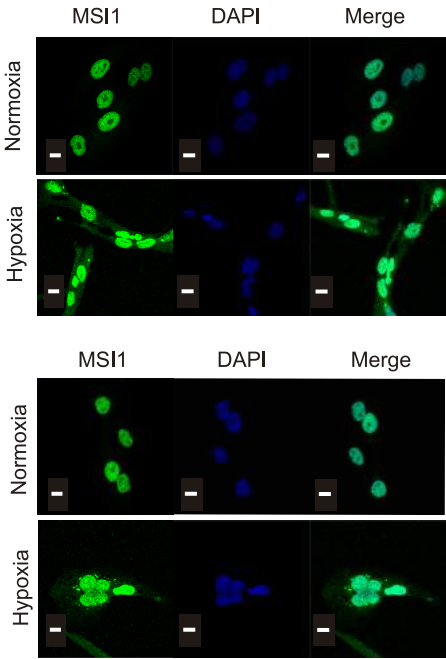

D

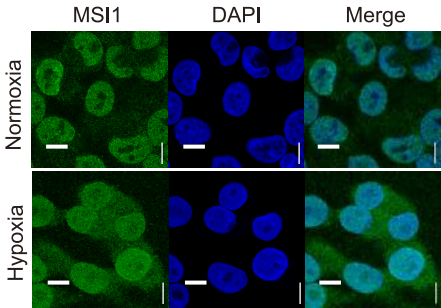

F

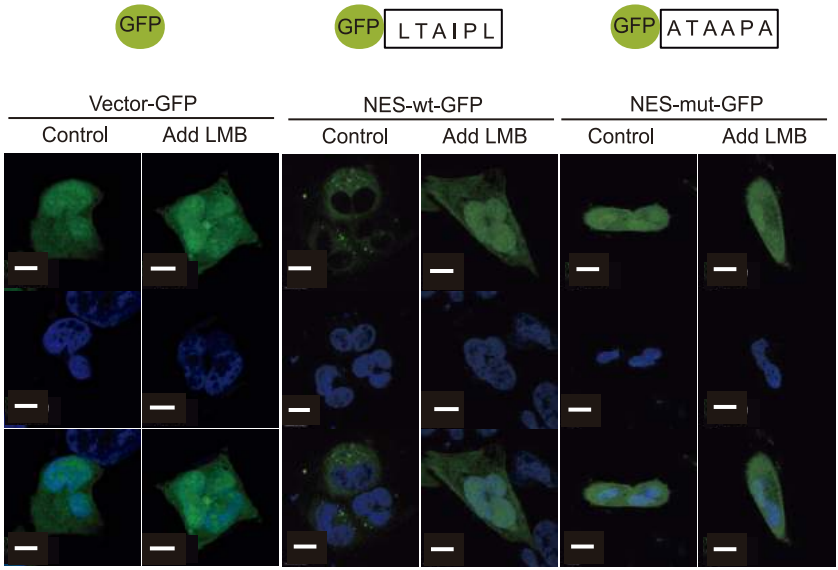

**Figure S3**

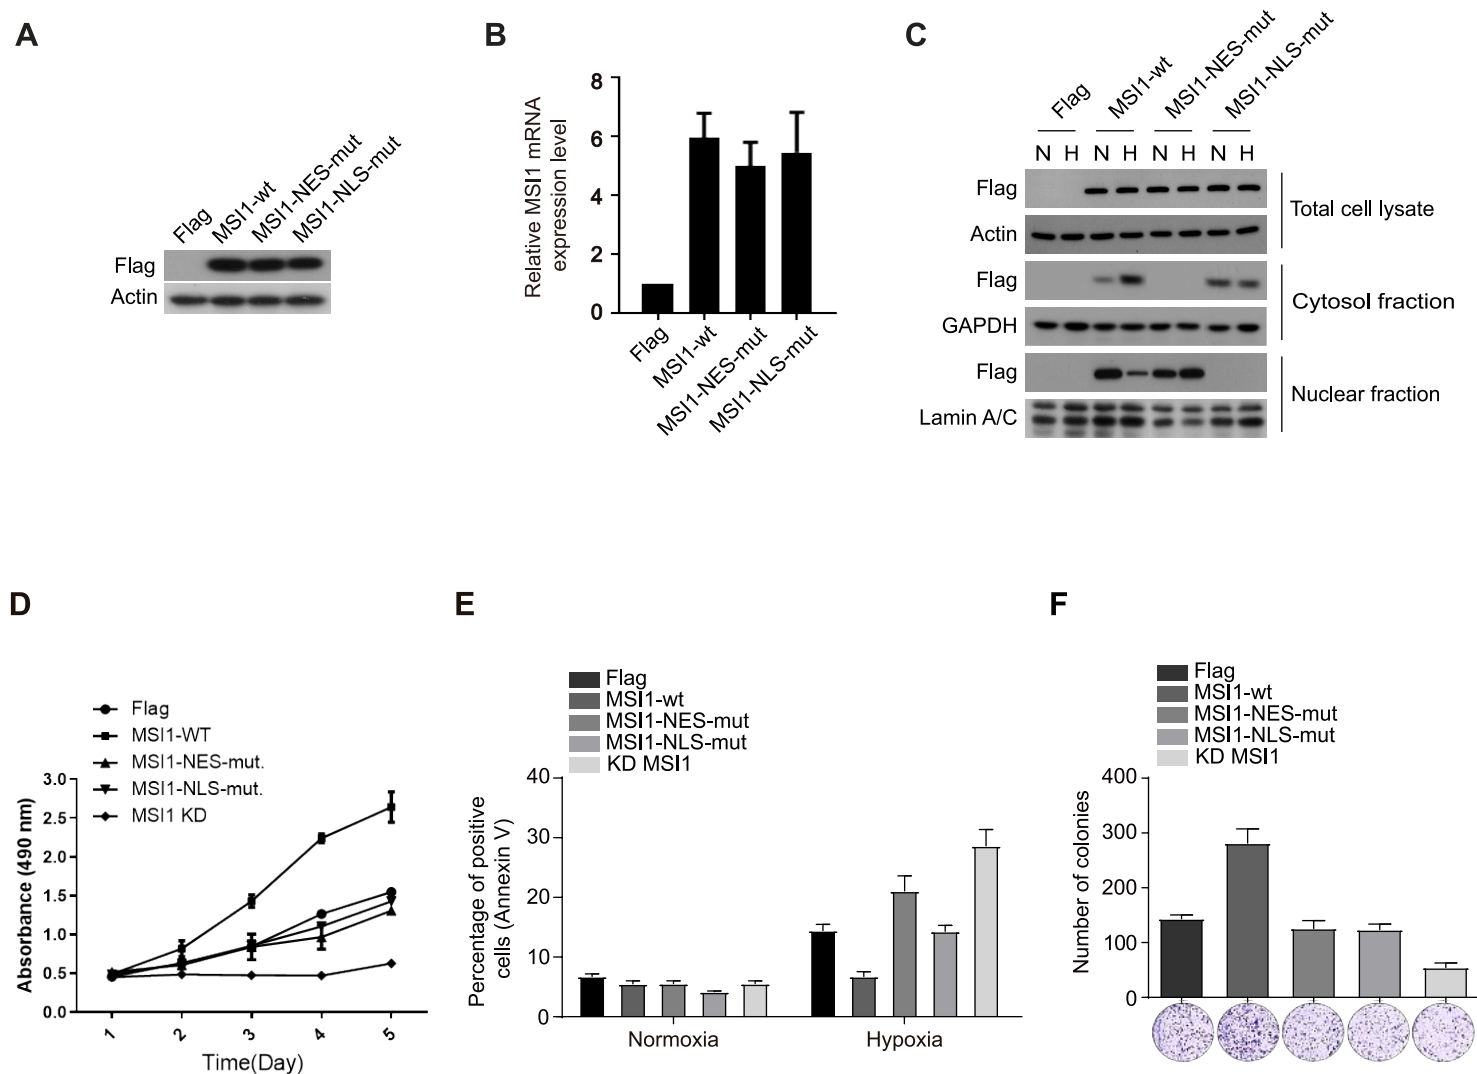

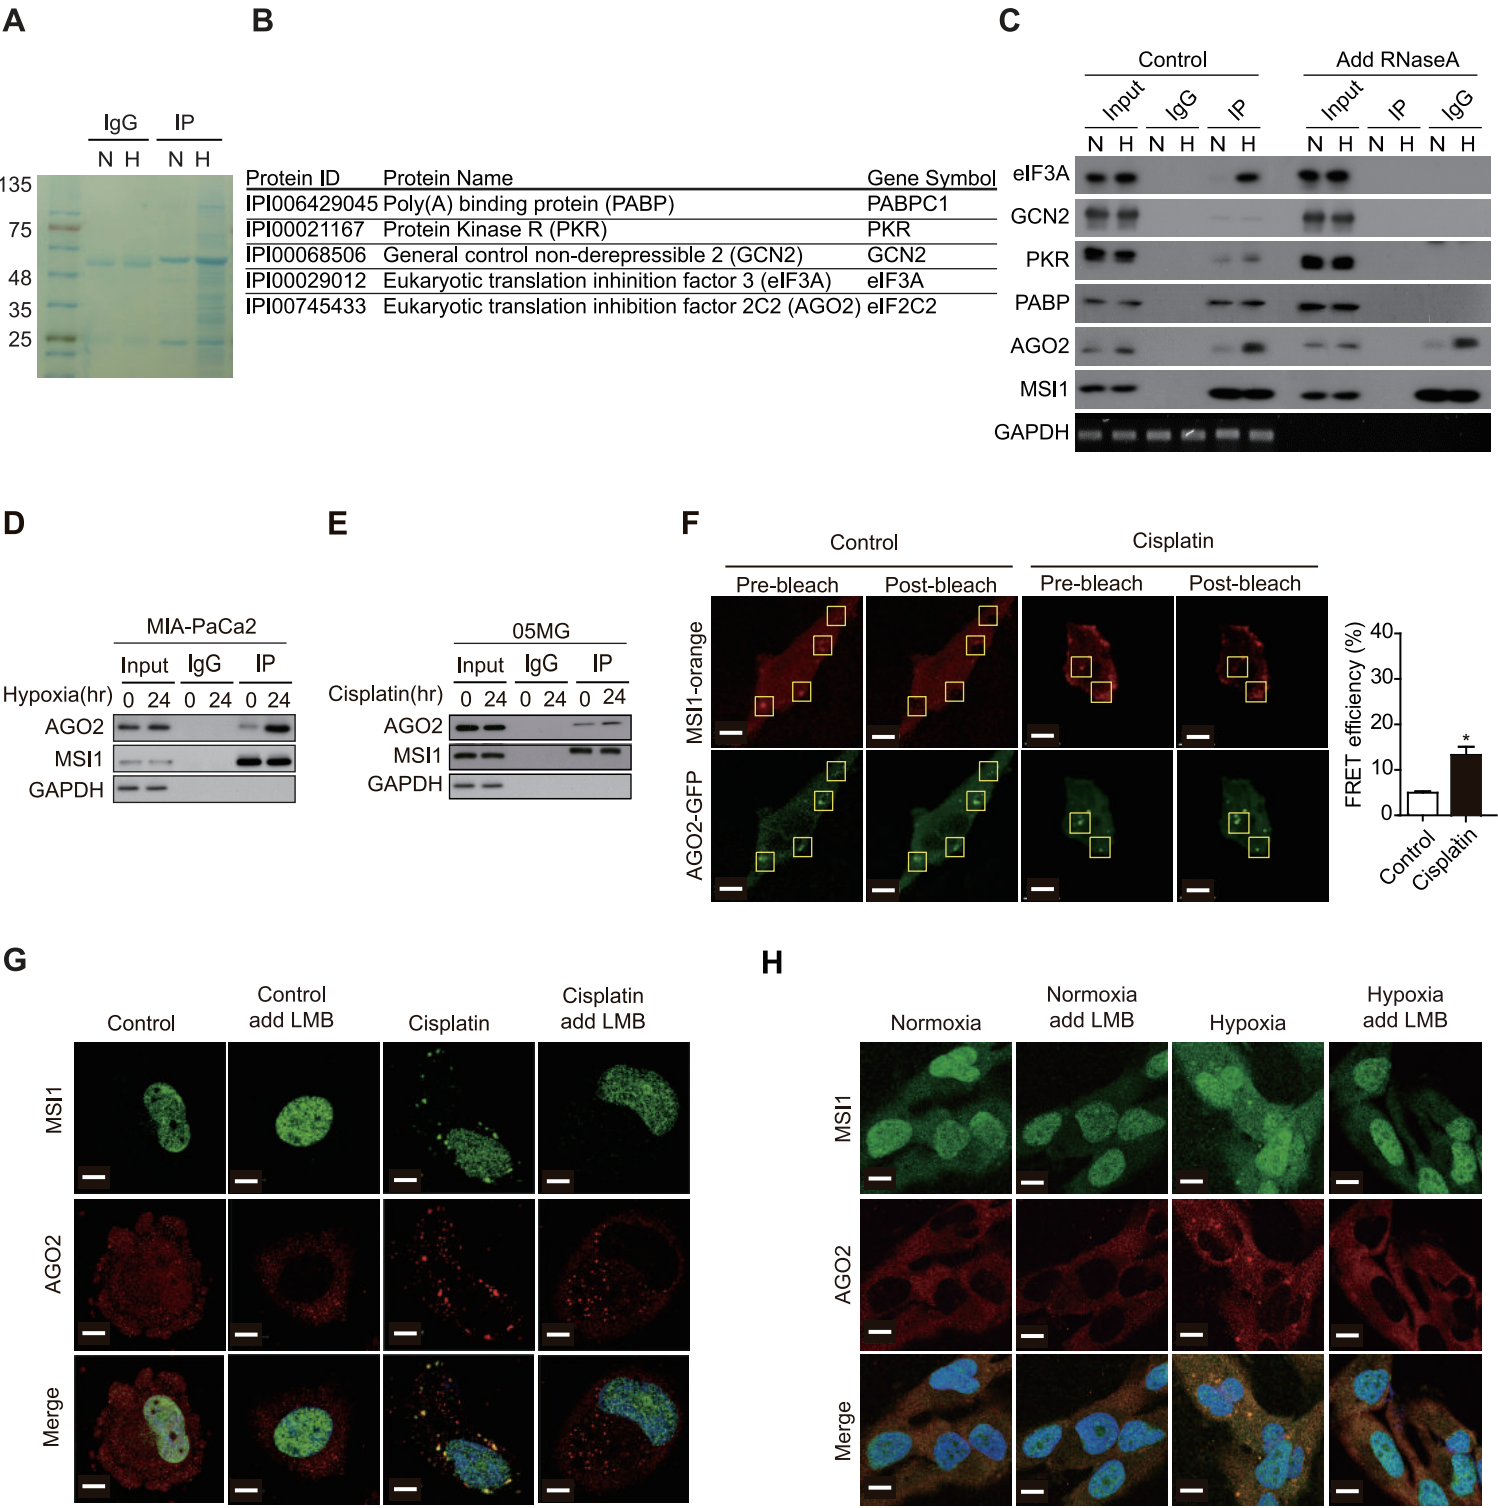

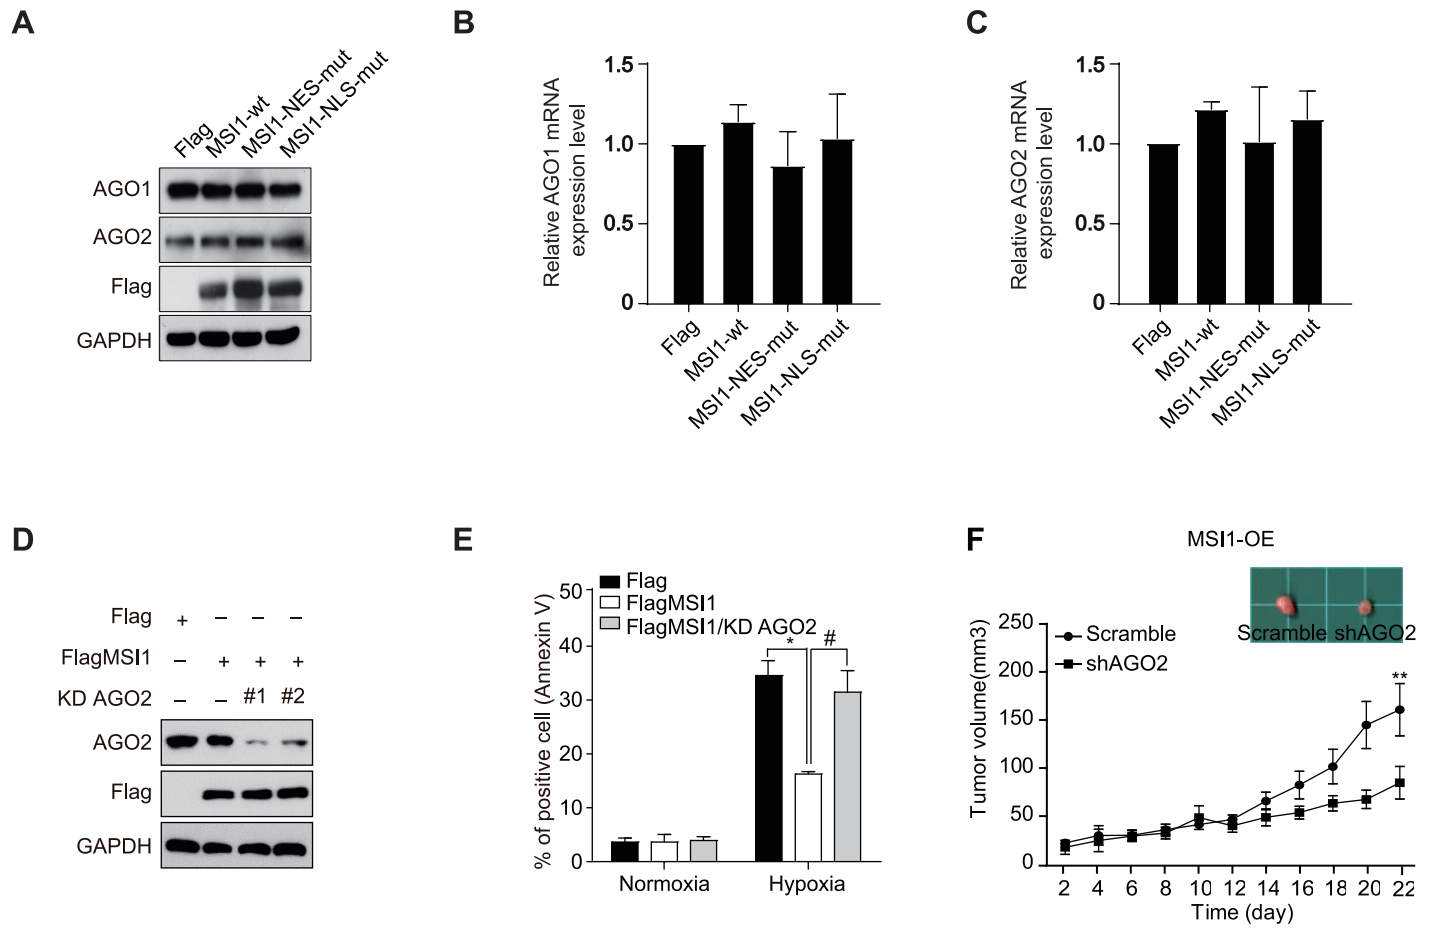

A

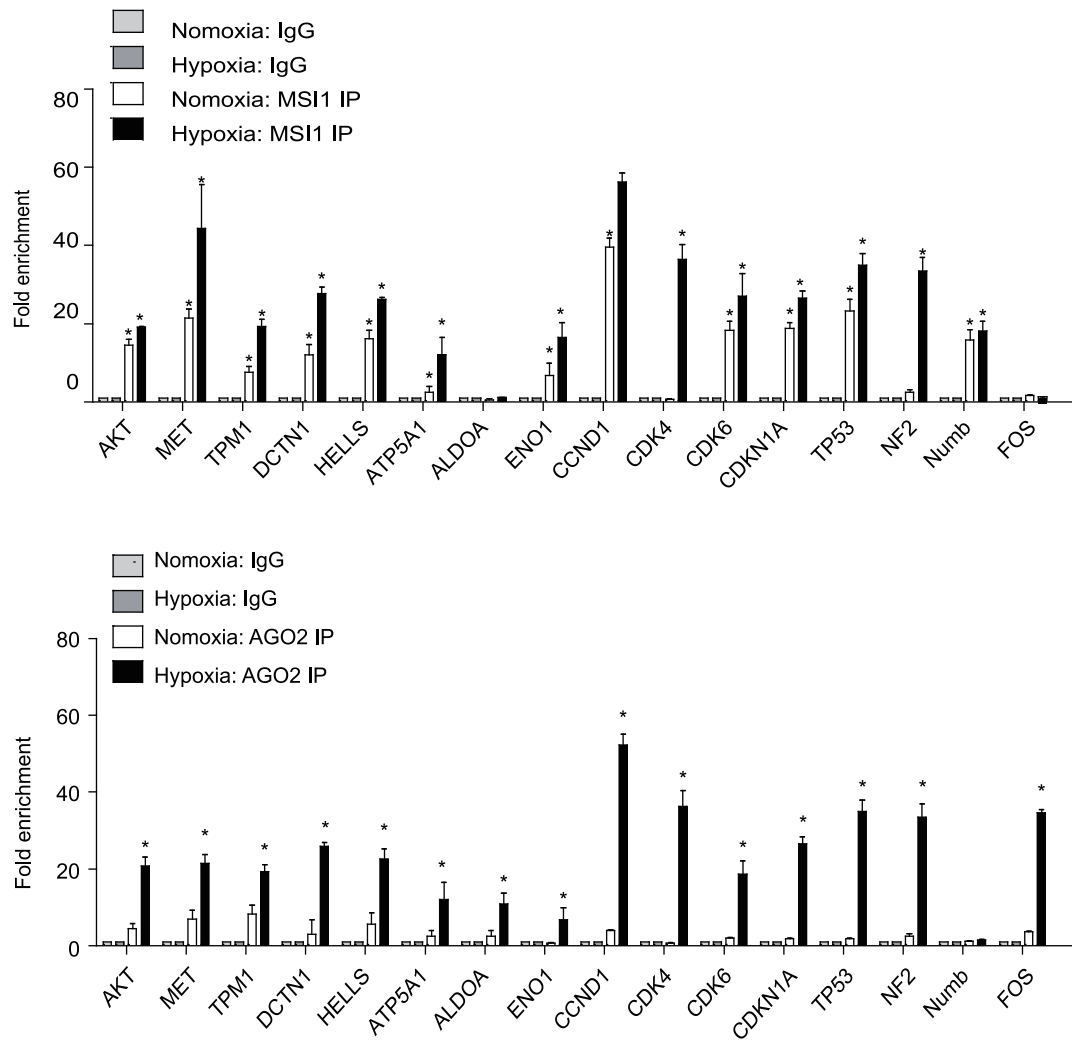

Supplement: Supplementary file 1 — Supplementary methods, figures, and tables. [file thnov10p0201s1.pdf]
